# Supplementary material for: Lower Energy-Adjusted Nutrient Intakes Occur Among Food Energy Under-Reporters With Poor Mental Health
Source: Frontiers journal article supplement (doi:10.3389/fnut.2022.833354), 2022-08-08
Supplement: Data_Sheet_1.pdf [file Data_Sheet_1.pdf]

**Figure S1: Energy adjusted macronutrient intakes that significantly differed by mental health state<sup>a</sup>**

**Figure 15a: Men 31-50 years (median intakes – fibre g/1000 kcal; carbohydrates & protein % of total calories)**

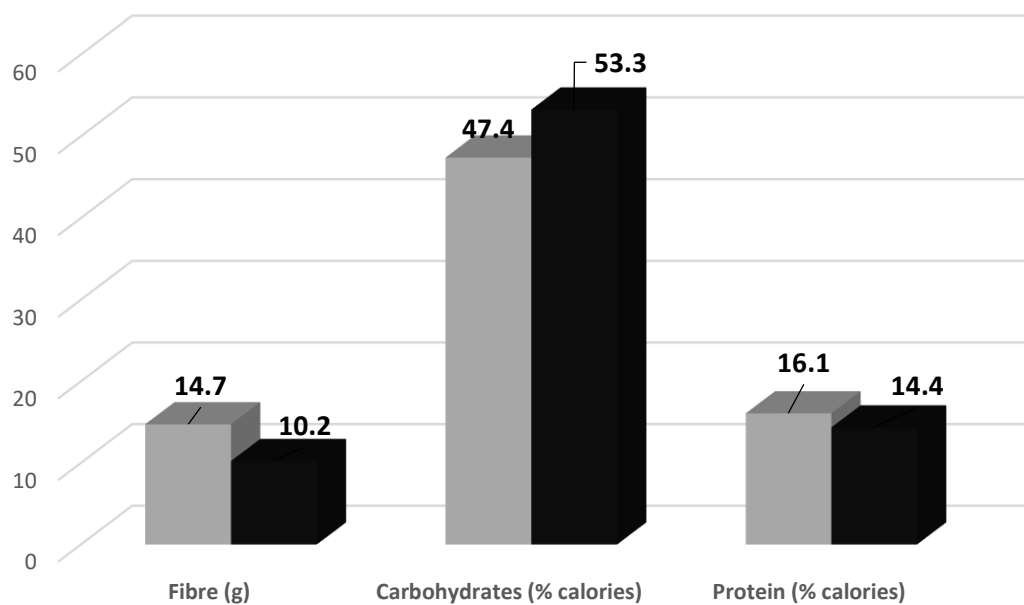

**Figure 15b: Women 31-50 years (median intakes - fibre g/1000 kcal; protein % of total calories) & 51-70 years (median intakes - fibre g/1000 kcal)**

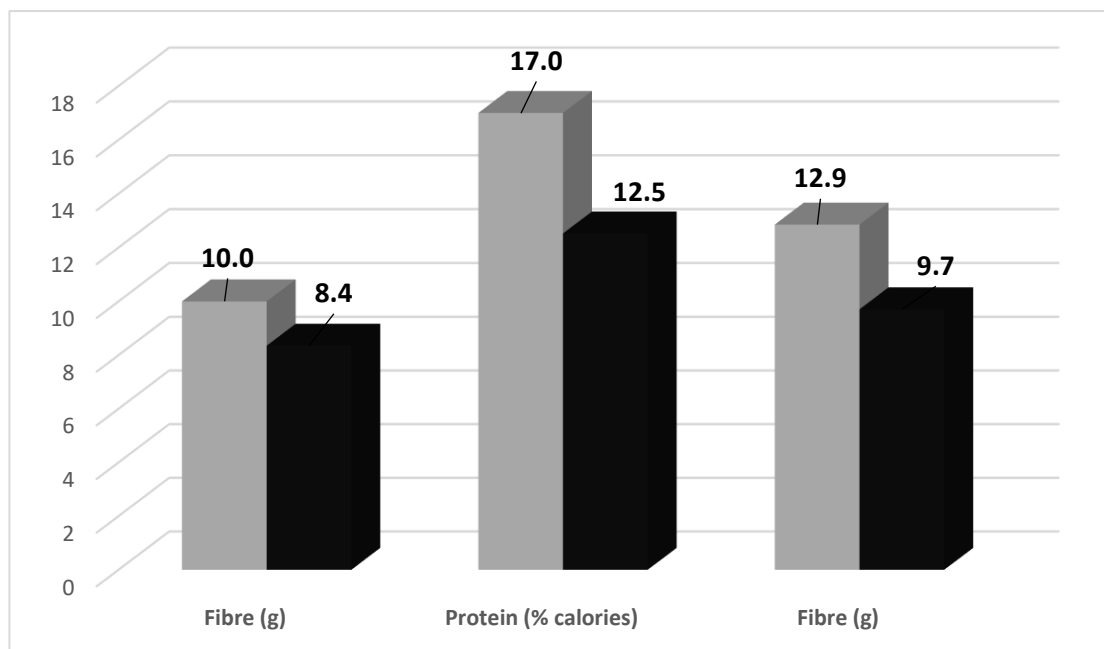

■ Good Mental Health      ■ Poor Mental Health

g=grams; kcal = kilocalories; <sup>a</sup>All energy adjusted macronutrient intake differences at  $p < 0.05$

**Figure S2: Energy adjusted vitamin intakes that significantly differed by mental health state<sup>a</sup>**

**Figure 2Sa: Men, 20-30 years (median intakes – vitamins B<sub>2</sub> & C mg/1000 kcal)**

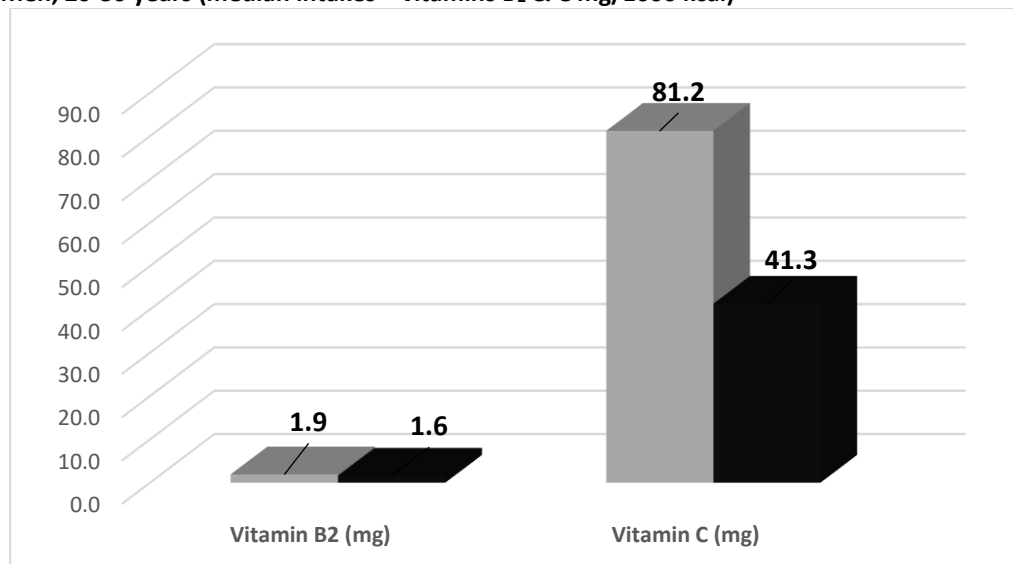

**Figure 2Sb: Men, 31-50 years (median intakes - vitamins B<sub>1</sub>, B<sub>2</sub>, B<sub>3</sub>, B<sub>6</sub> mg/1000 kcal; vitamins B<sub>12</sub> (mcg/1000 kcal) & B<sub>9</sub> (mcg DFE/1000 kcal)**

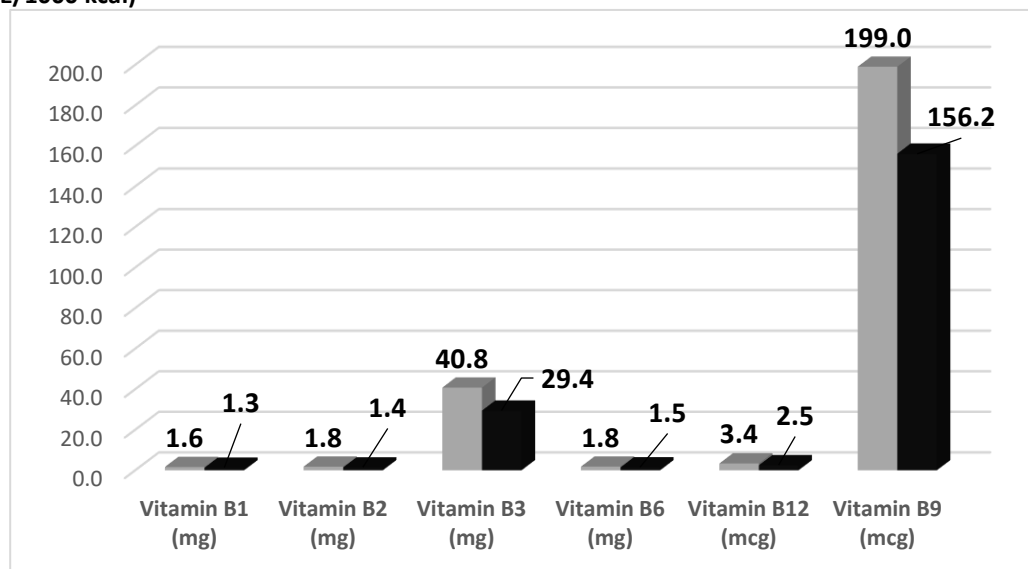

■ Good Mental Health      ■ Poor Mental Health

DFE = dietary folate equivalents; kcal = kilocalories; mg = milligrams; mcg = micrograms

**Figure S2: Energy adjusted vitamin intakes that significantly differed by mental health state<sup>a</sup> /cont'd**  
**Figure 2Sc: Men, 51-70 years (median intakes – vitamin A RAE/1000 kcal; vitamin D mcg/1000 kcal)**

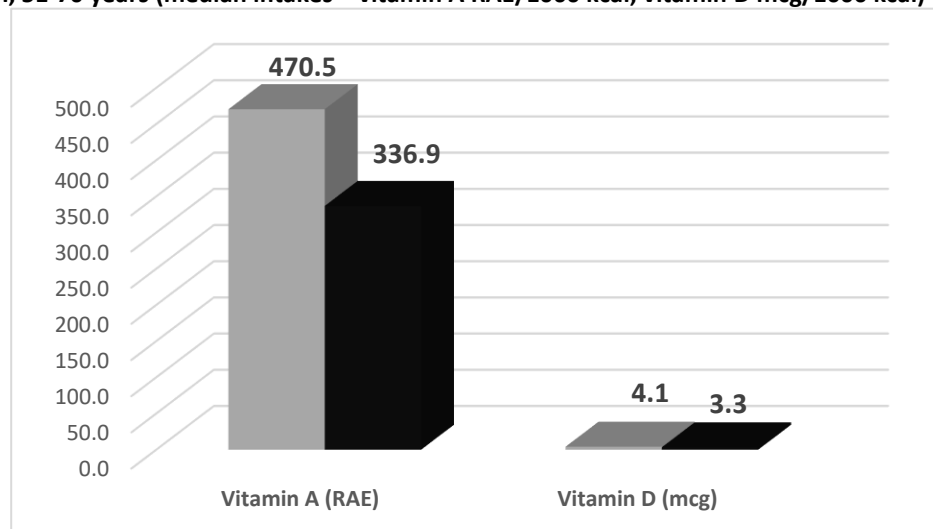

**Figure 2Sd: Women, 14-19 (median intakes - vitamin A RAE/1000 kcal) & 20-30 years (median intakes - vitamin B<sub>6</sub> & C mg/1000kcal)**

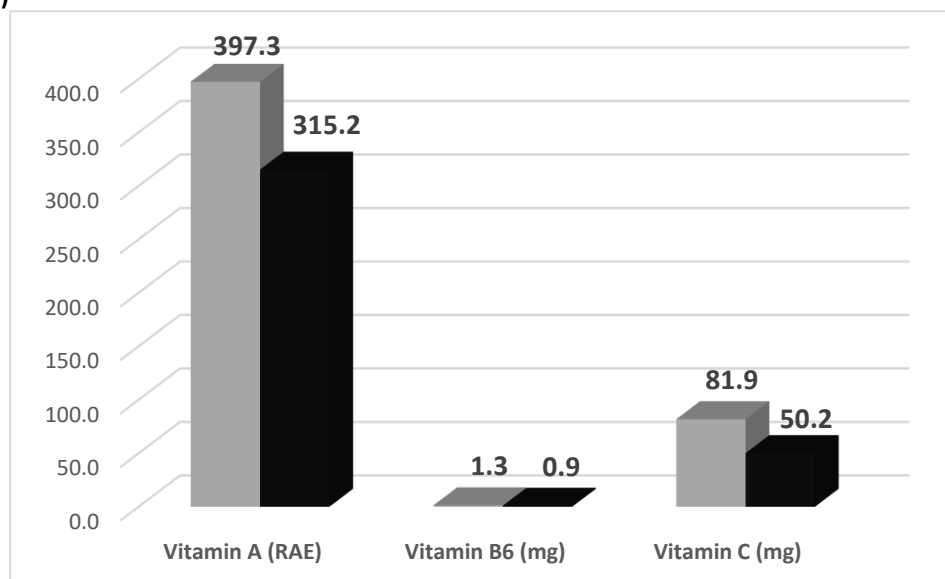

Good Mental Health
  Poor Mental Health

kcal = kilocalories; mg = milligrams; mcg = micrograms; RAE = retinal activity equivalents

**Figure S2: Energy adjusted vitamin intakes that significantly differed by mental health state<sup>a</sup> /cont'd**

**Figure 2Se: Women, 31-50 years (median intakes – vitamins A RAE/1000 kcal, B<sub>3</sub> mg/1000 kcal, & vitamin B<sub>9</sub> mcg DFE/1000 kcal)**

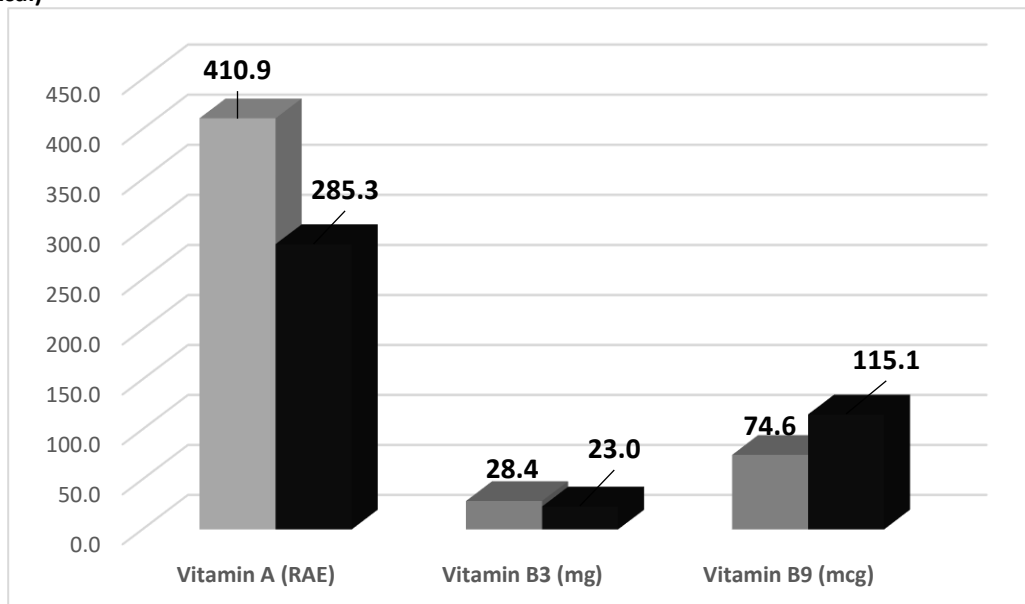

**Figure 2Sf: Women, 51-70 years (median intakes – vitamins A RAE/1000 kcal, B<sub>1</sub>, B<sub>2</sub>, B<sub>3</sub>, B<sub>6</sub>, C mg/1000 kcal; vitamin B<sub>9</sub> mcg DFE/1000 kcal; vitamins B<sub>12</sub> & D mcg/1000 kcal)**

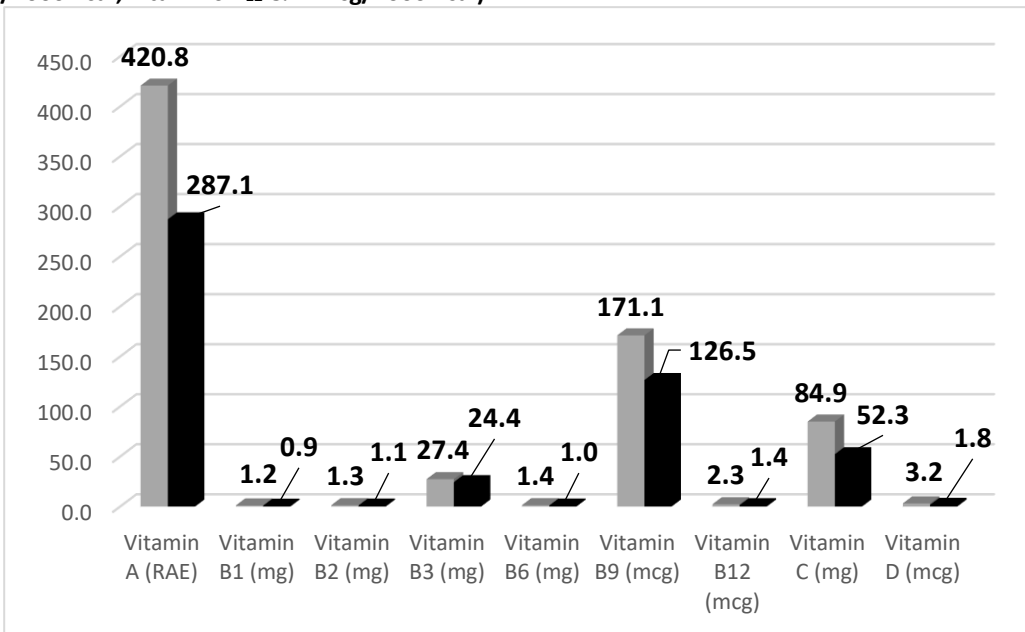

Good Mental Health
  Poor Mental Health

DFE = dietary folate equivalents; kcal = kilocalories; mg = milligrams; mcg = micrograms; RAE = retinal activity equivalents; <sup>a</sup>All energy adjusted vitamin intake differences at p<0.05

**Figure S3: Energy adjusted mineral intakes that significantly differed by mental health state<sup>a</sup>**

**Figure 3Sa: Men, 20-30 (median intakes - calcium & zinc mg/1000 kcal) & 51-70 years (median intakes - calcium mg/1000 kcal)**

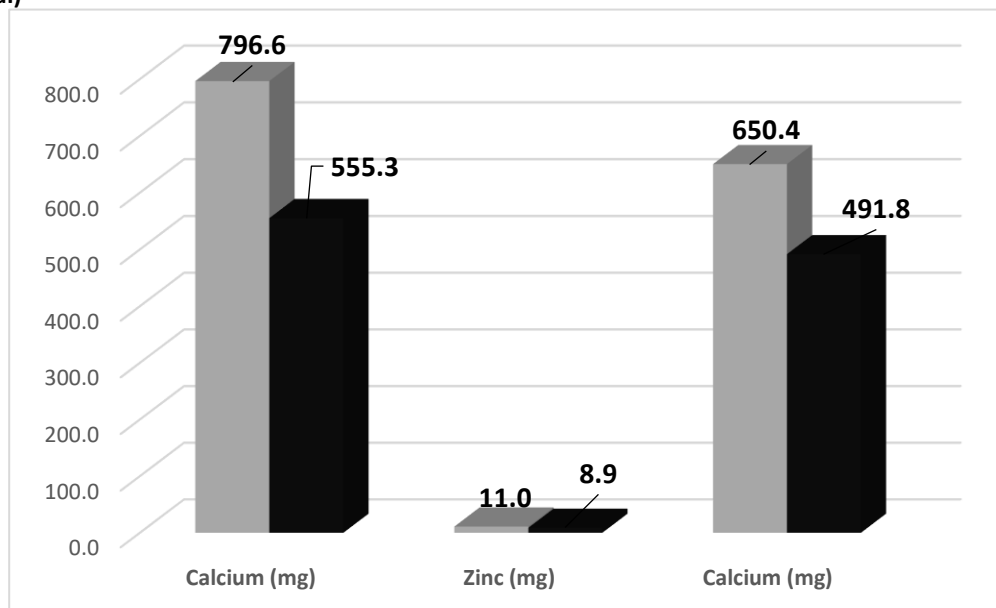

**Figure 3Sb: Men, 31-50 years (major minerals: median intakes - calcium & potassium mg/1000 kcal)**

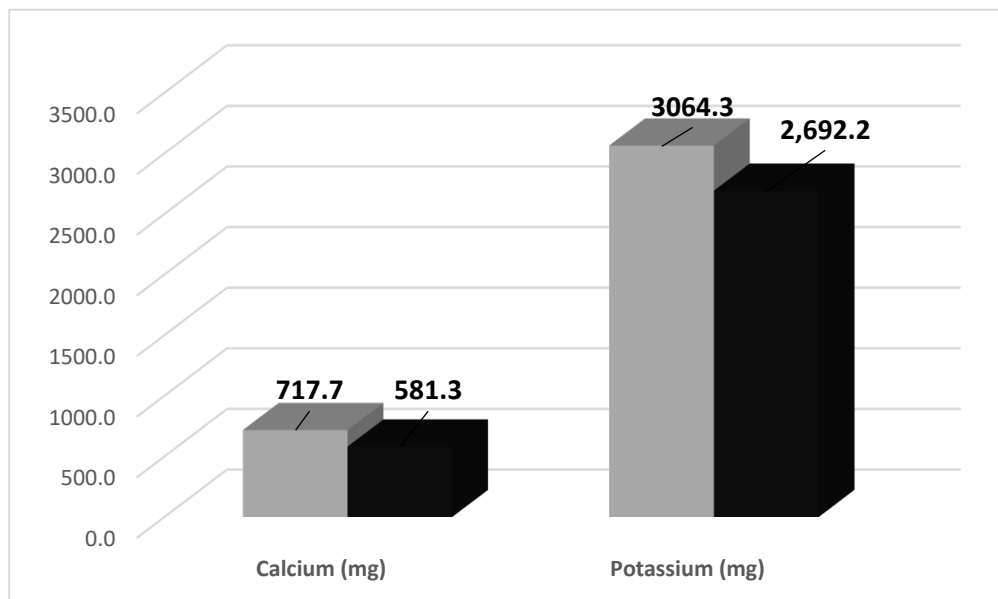

■ Good Mental Health      ■ Poor Mental Health

kcal = kilocalories; mg = milligrams

**Figure S3: Energy adjusted mineral intakes that significantly differed by mental health state<sup>a</sup> /cont'd**

**Figure 3Sc: Men, 31-50 years (trace minerals: median intakes - iron, magnesium, & zinc mg/1000 kcal)**

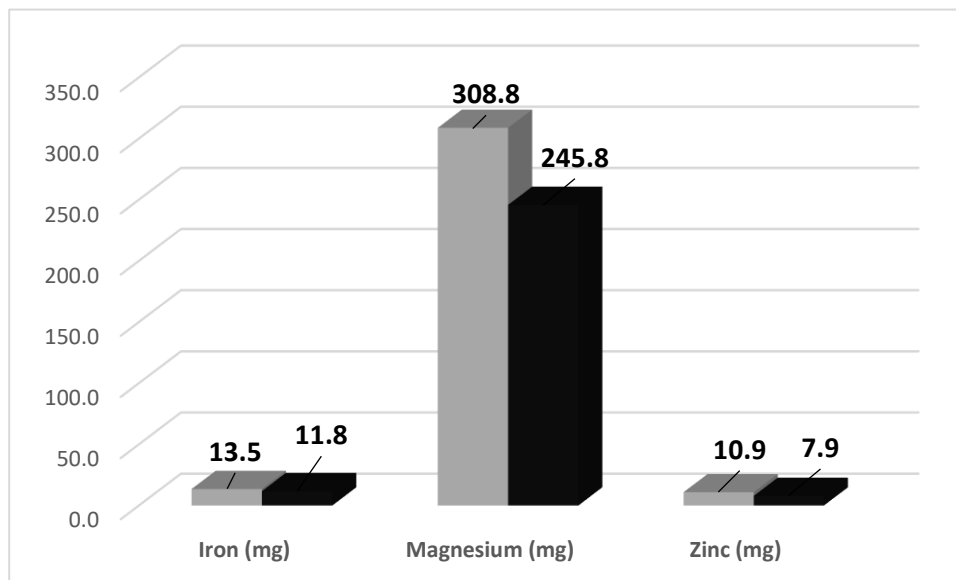

**Figure 3Sd: Women, 20-30 (major minerals: median intakes - calcium mg/1000 kcal) & 31-50 years (major minerals: median intakes - phosphorus & potassium mg/1000 kcal)**

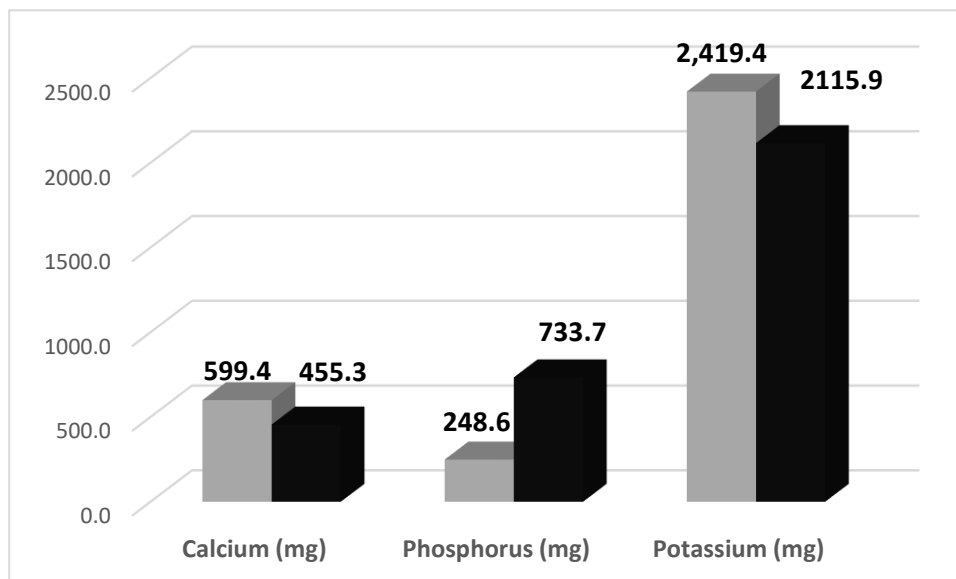

Good Mental Health      Poor Mental Health

kcal = kilocalories; mg = milligrams

**Figure S3: Energy adjusted mineral intakes that significantly differed by mental health state<sup>a</sup> /cont'd**

**Figure 3Se: Women, 51-70 years (major minerals: median intakes - calcium, phosphorus, potassium, & sodium mg/1000 kcal)**

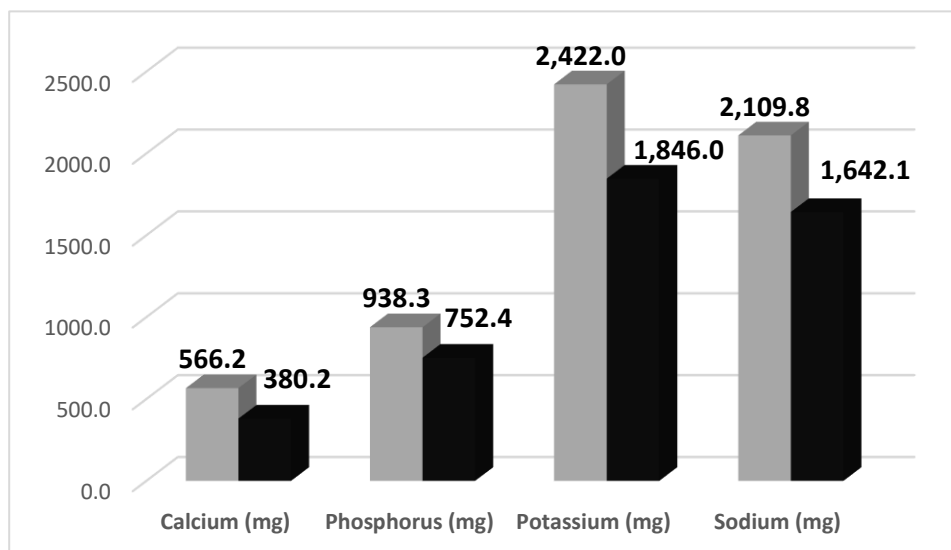

**Figure 3Sf: Women, 51-70 years (trace minerals: median intakes - magnesium & zinc mg/1000 kcal)**

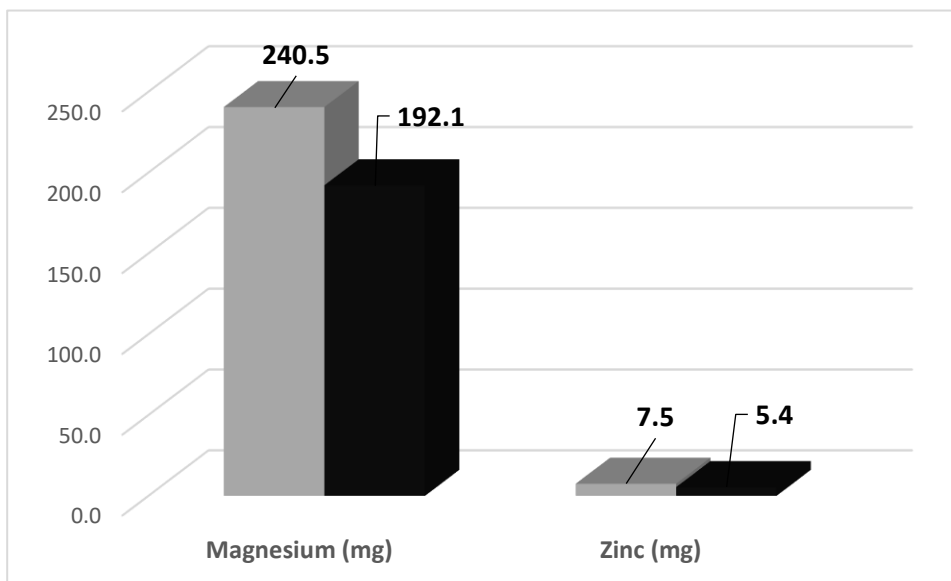

■ Good Mental Health      ■ Poor Mental Health

kcal = kilocalories; mg = milligrams; <sup>a</sup>All energy adjusted dietary mineral intake differences at p<0.05
